# Supplementary material for: Structural and pathophysiological muscle changes up to one year after post-stroke hemiplegia: a systematic review
Source: PubMed Central journal article supplement — Eur J Phys Rehabil Med. 2023 Sep 11;59(4):474–87. doi: 10.23736/S1973-9087.23.07844-9 (PMC10548887; doi:10.23736/s1973-9087.23.07844-9), 2023-09-11
Supplement: Supplementary_Digital_Material1.pdf [file Supplementary_Digital_Material1.pdf]

## SUPPLEMENTARY DIGITAL MATERIAL 1

### Search strategies in PubMed

((((((((((("stroke"[MeSH Major Topic] AND ("muscle, skeletal"[MeSH Terms] OR ("muscle"[All Fields] AND "skeletal"[All Fields]) OR "skeletal muscle"[All Fields] OR ("skeletal"[All Fields] AND "muscle"[All Fields]))) OR ("stroke"[MeSH Major Topic] AND ("muscular atrophy"[MeSH Terms] OR ("muscular"[All Fields] AND "atrophy"[All Fields]) OR "muscular atrophy"[All Fields] OR ("muscle"[All Fields] AND "atrophy"[All Fields]) OR "muscle atrophy"[All Fields]))) OR ("stroke"[MeSH Major Topic] AND ("muscle, skeletal"[MeSH Terms] OR ("muscle"[All Fields] AND "skeletal"[All Fields]) OR "skeletal muscle"[All Fields] OR ("skeletal"[All Fields] AND "muscle"[All Fields])) AND ("muscular atrophy"[MeSH Terms] OR ("muscular"[All Fields] AND "atrophy"[All Fields]) OR "muscular atrophy"[All Fields] OR ("muscle"[All Fields] AND "atrophy"[All Fields]) OR "muscle atrophy"[All Fields]))) OR ("stroke"[MeSH Major Topic] AND ("muscular atrophy"[MeSH Terms] OR ("muscular"[All Fields] AND "atrophy"[All Fields]) OR "muscular atrophy"[All Fields] OR ("muscle"[All Fields] AND "atrophy"[All Fields]) OR "muscle atrophy"[All Fields]) AND ("muscle strength"[MeSH Terms] OR ("muscle"[All Fields] AND "strength"[All Fields]) OR "muscle strength"[All Fields]))) OR ("stroke"[MeSH Major Topic] AND ("muscular atrophy"[MeSH Terms] OR ("muscular"[All Fields] AND "atrophy"[All Fields]) OR "muscular atrophy"[All Fields] OR ("muscle"[All Fields] AND "atrophy"[All Fields]) OR "muscle atrophy"[All Fields]) AND ("microscopies"[All Fields] OR "microscopy"[MeSH Terms] OR "microscopy"[All Fields]))) OR ("stroke"[MeSH Major Topic] AND ("microscopies"[All Fields] OR "microscopy"[MeSH Terms] OR "microscopy"[All Fields]))) OR ("stroke"[MeSH Major Topic] AND ("muscular atrophy"[MeSH Terms] OR ("muscular"[All Fields] AND "atrophy"[All Fields]) OR "muscular atrophy"[All Fields] OR ("muscle"[All Fields] AND "atrophy"[All Fields]) OR "muscle atrophy"[All Fields])

("muscle"[All Fields] AND "atrophy"[All Fields]) OR "muscle atrophy"[All Fields]) AND ("oxidative stress"[MeSH Terms] OR ("oxidative"[All Fields] AND "stress"[All Fields]) OR "oxidative stress"[All Fields])) OR ("stroke"[MeSH Major Topic] AND ("oxidative stress"[MeSH Terms] OR ("oxidative"[All Fields] AND "stress"[All Fields]) OR "oxidative stress"[All Fields])) OR ("stroke"[MeSH Major Topic] AND ("muscular atrophy"[MeSH Terms] OR ("muscular"[All Fields] AND "atrophy"[All Fields]) OR "muscular atrophy"[All Fields] OR ("muscle"[All Fields] AND "atrophy"[All Fields]) OR "muscle atrophy"[All Fields]) AND ("mitochondria"[MeSH Terms] OR "mitochondria"[All Fields] OR "mitochondrion"[All Fields] OR "mitochondrion s"[All Fields] OR "mitochondrions"[All Fields])) OR ("stroke"[MeSH Major Topic] AND ("paresis"[MeSH Terms] OR "paresis"[All Fields] OR "pareses"[All Fields])) OR ("stroke"[MeSH Major Topic] AND ("paresis"[MeSH Terms] OR "paresis"[All Fields] OR "pareses"[All Fields]) AND ("mitochondria"[MeSH Terms] OR "mitochondria"[All Fields] OR "mitochondrion"[All Fields] OR "mitochondrion s"[All Fields] OR "mitochondrions"[All Fields])) OR (("paresis"[MeSH Terms] OR "paresis"[All Fields] OR "pareses"[All Fields]) AND ("mitochondria"[MeSH Terms] OR "mitochondria"[All Fields] OR "mitochondrion"[All Fields] OR "mitochondrion s"[All Fields] OR "mitochondrions"[All Fields])) OR ("stroke"[MeSH Major Topic] AND ("mitochondria"[MeSH Terms] OR "mitochondria"[All Fields] OR "mitochondrion"[All Fields] OR "mitochondrion s"[All Fields] OR "mitochondrions"[All Fields])) OR ("stroke"[MeSH Major Topic] AND ("motor control"[Journal] OR ("motor"[All Fields] AND "control"[All Fields]) OR "motor control"[All Fields])) OR ("stroke"[MeSH Major Topic] AND (("motor"[All Fields] OR "motor s"[All Fields] OR "motoric"[All Fields] OR "motorically"[All Fields] OR "motorics"[All Fields] OR "motoring"[All Fields] OR "motorisation"[All Fields] OR "motorised"[All Fields] OR "motorization"[All Fields] OR "motorized"[All Fields] OR "motors"[All Fields]) AND "unit"[All Fields])

### **Search Strategies in Embase**

('cerebrovascular accident'/exp/mj AND ('mitochondrion'/exp OR 'motor control'/exp OR 'motor unit'/exp OR 'paresis'/exp OR 'oxidative stress'/exp OR 'microscopy'/exp OR 'muscle atrophy'/exp OR 'skeletal muscle'/exp)) OR ('paresis'/exp AND 'mitochondrion'/exp) OR ('cerebrovascular accident'/exp/mj AND 'paresis'/exp AND 'mitochondrion'/exp) OR ('cerebrovascular accident'/exp/mj AND 'muscle atrophy'/exp AND 'mitochondrion'/exp) OR ('cerebrovascular accident'/exp/mj AND 'muscle atrophy'/exp AND 'oxidative stress'/exp) OR ('cerebrovascular accident'/exp/mj AND 'muscle atrophy'/exp AND 'microscopy'/exp) OR ('cerebrovascular accident'/exp/mj AND 'muscle atrophy'/exp AND 'muscle strength'/exp) OR ('cerebrovascular accident'/exp/mj AND 'skeletal muscle'/exp AND 'muscle atrophy'/exp)
